# Supplementary material for: STAT3 Inhibitory Activities of Lignans Isolated from the Stems of <em>Lindera obtusiloba </em>Blume
Source: Preprints.org preprint supplement (doi:10.20944/preprints202310.1509.v1), 2023-10-24
Supplement: Supplementary file 2 [file supplementary]

***Supplementary data***

**STAT3 inhibitory activities of lignans isolated from the stems of *Lindera obtusiloba* Blume**

**Eun-Jae Parka,b, Hee-Ju Lima,b, Hyung-Jin Lima, Bong-Sik Yunb, Soyoung Leea, Seung-Jae Leea, Seung Woong Leea,[[1]](#footnote-1)**

*a Functionality Biomaterial Research Center, Korea Research Institute of Bioscience and Biotechnology, Jeonbuk 56212, Republic of Korea*

*bDivision of Biotechnology and Advanced Institute of Environment and Bioscience, College of Environmental and Bioresource Sciences, Jeonbuk National University, Iksan-si, Republic of Korea*

* Corresponding authors.

E-mail address: lswdoc@kribb.re.kr

**Figure legends**

**Figure S1.** 1H NMR spectrum of compound **1**

**Figure S2.** 13C NMR spectrum of compound **1**

**Figure S3.** 1H NMR spectrum of compound **2**

**Figure S4.** 13C NMR spectrum of compound **2**

**Figure S5.** 1H NMR spectrum of compound **3**

**Figure S6.** 13C NMR spectrum of compound **3**

**Figure S7.** 1H NMR spectrum of compound **4**

**Figure S8.** 13C NMR spectrum of compound **4**

**Figure S9.** 1H NMR spectrum of compound **5**

**Figure S10.** 13C NMR spectrum of compound **5**

**Figure S11.** 1H NMR spectrum of compound **6**

**Figure S12.** 13C NMR spectrum of compound 6

**Figure S13.** 1H NMR spectrum of compound **7**

**Figure S14.** 13C NMR spectrum of compound **7**

**
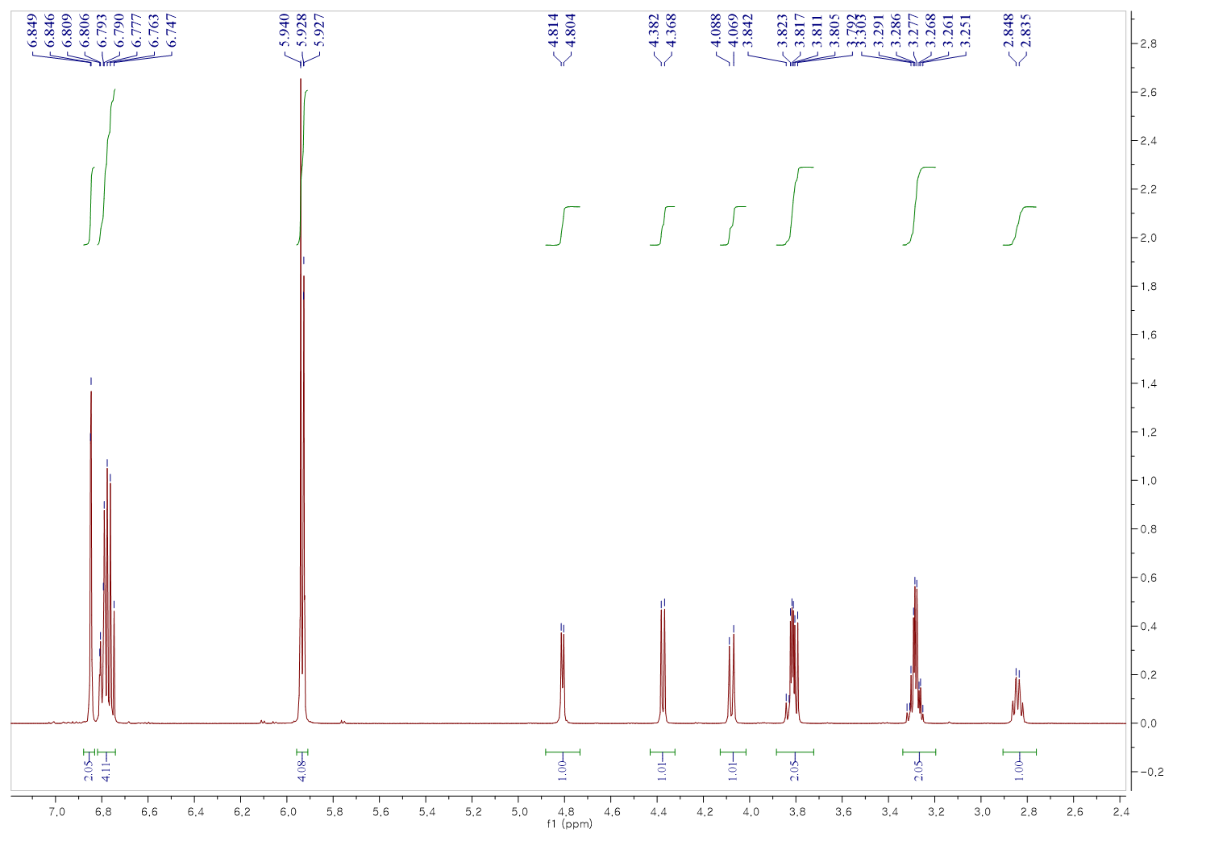
**

**Figure S1.** 1H NMR spectrum of compound **1**


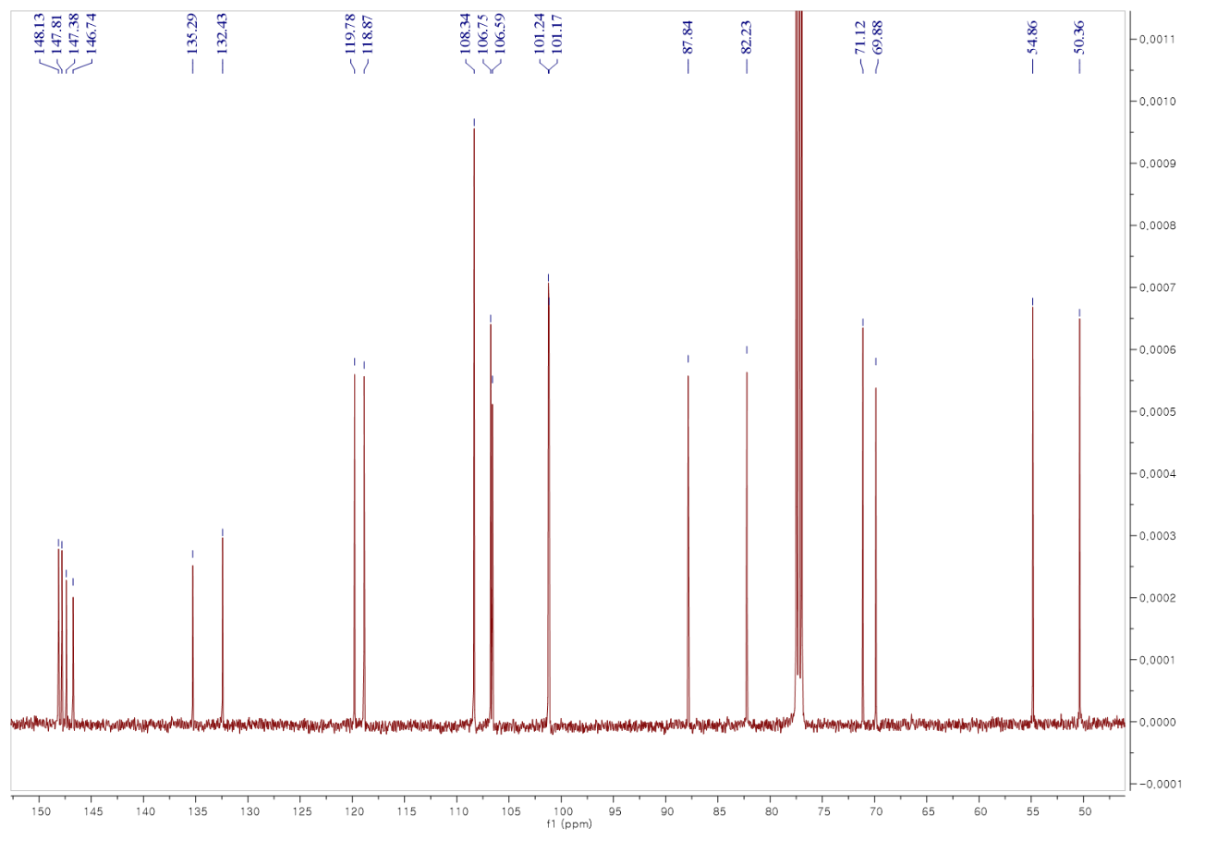


**Figure S2.** 13C NMR spectrum of compound **1**


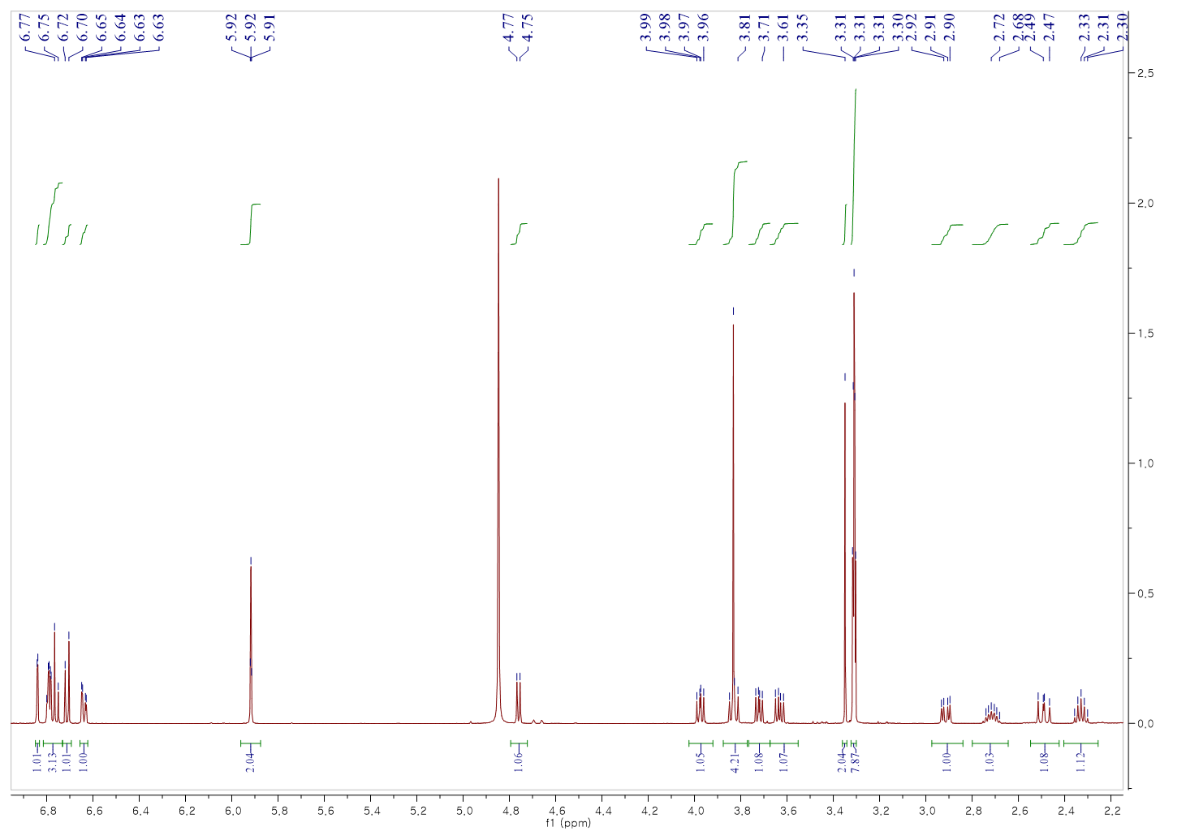


**Figure S3.** 1H NMR spectrum of compound **2**


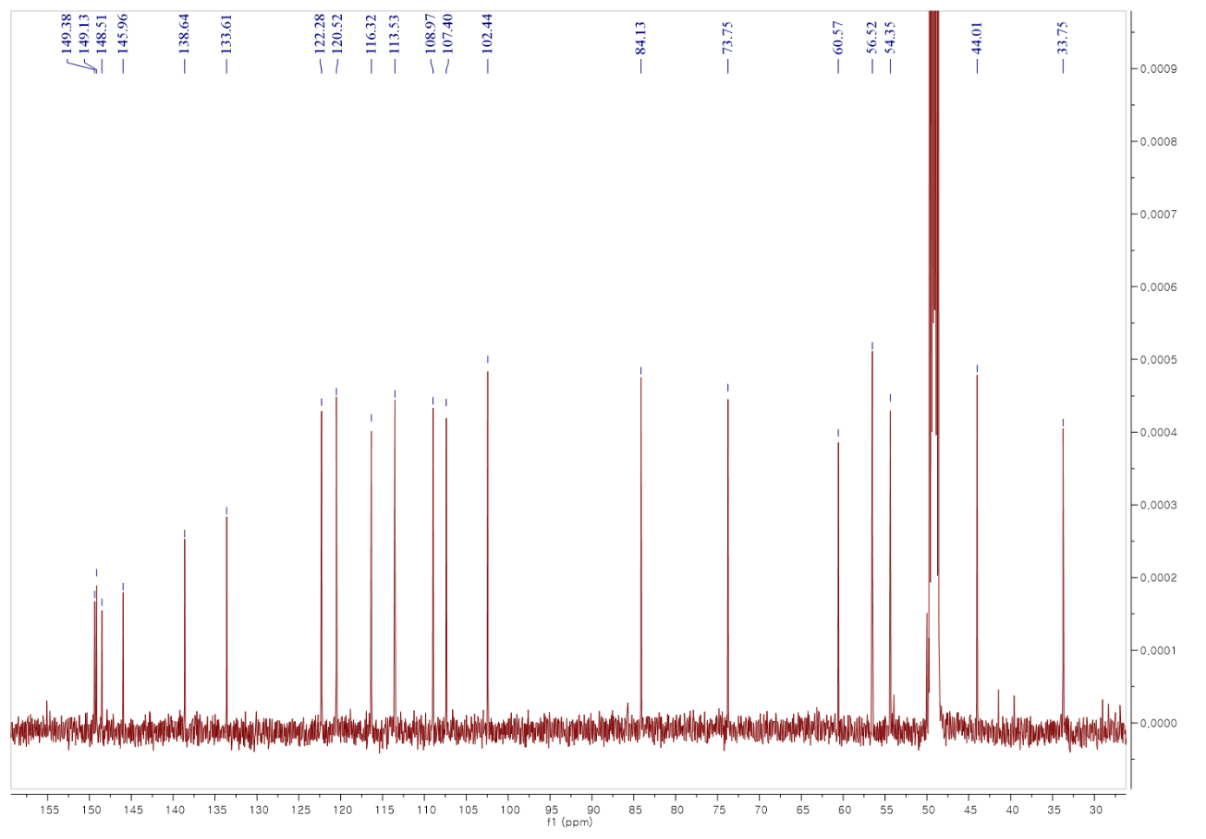


**Figure S4.** 13C NMR spectrum of compound **2**


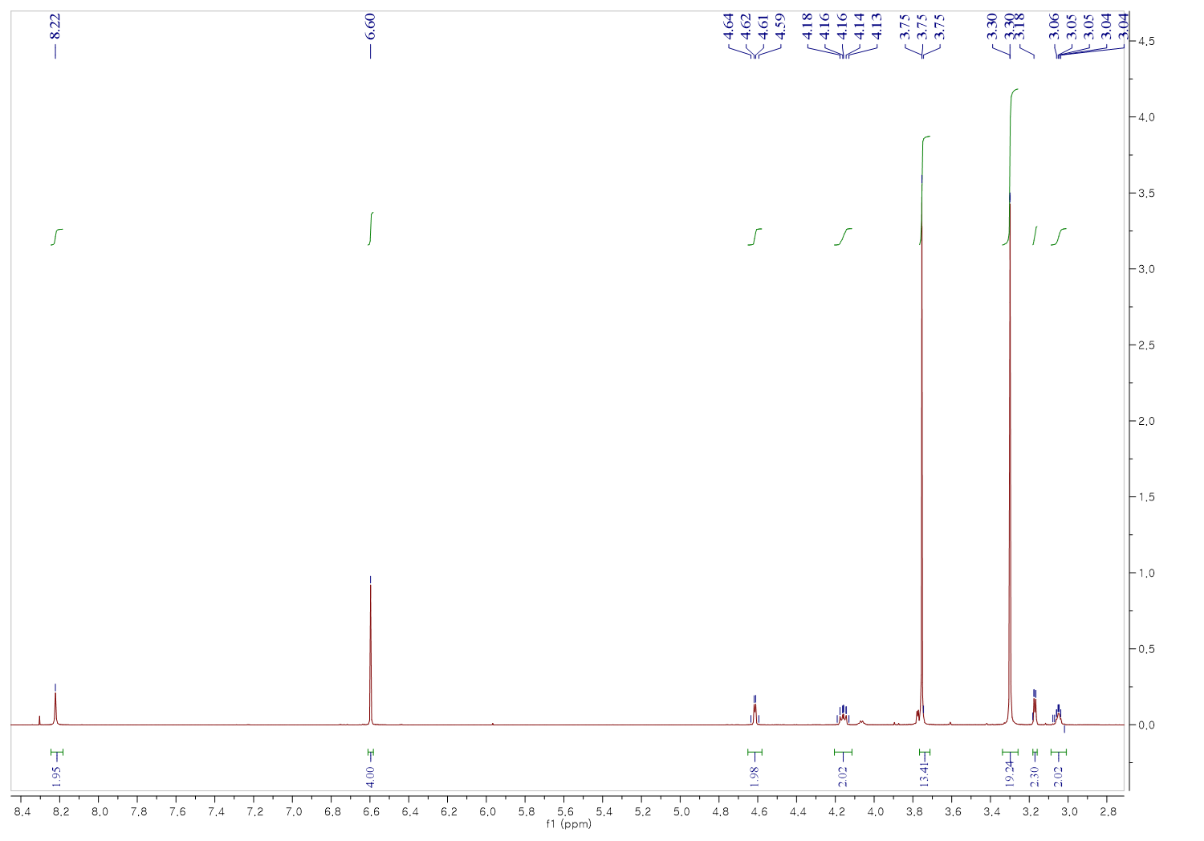


**Figure S5.** 1H NMR spectrum of compound **3**


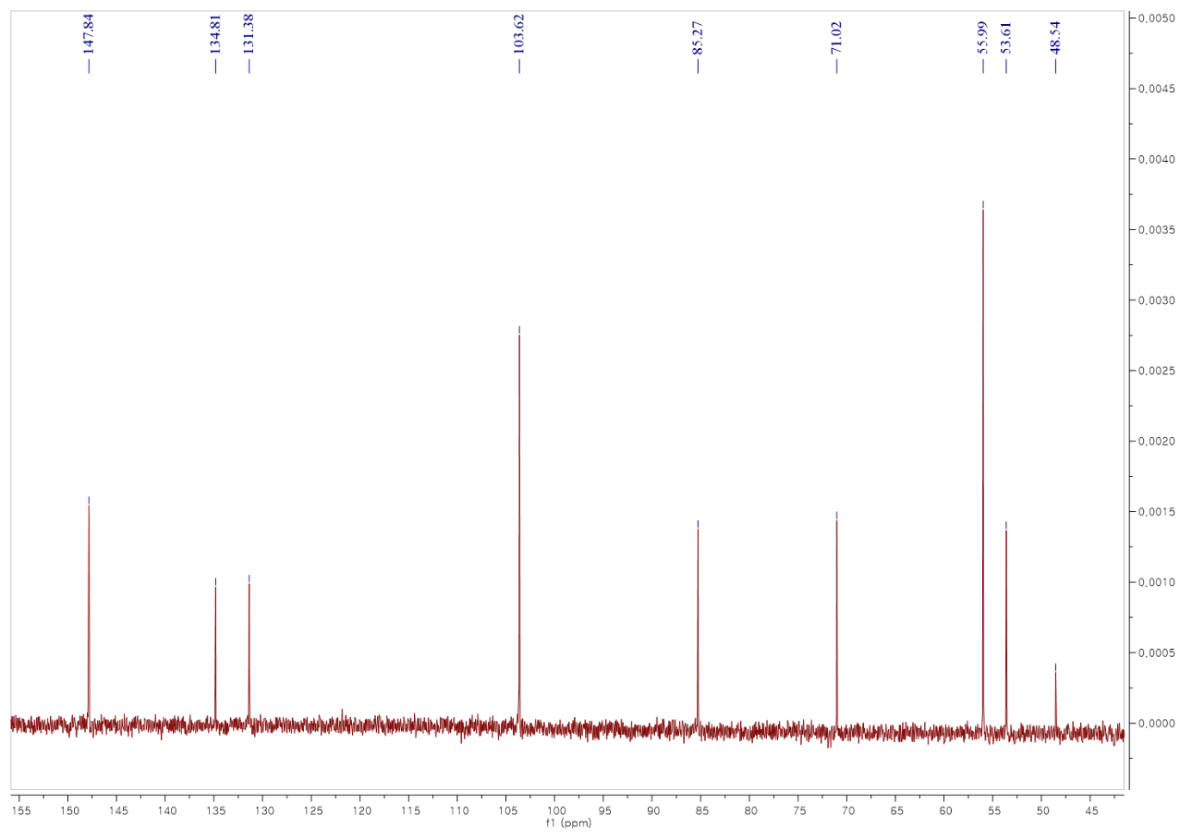


**Figure S6.** 13C NMR spectrum of compound 3


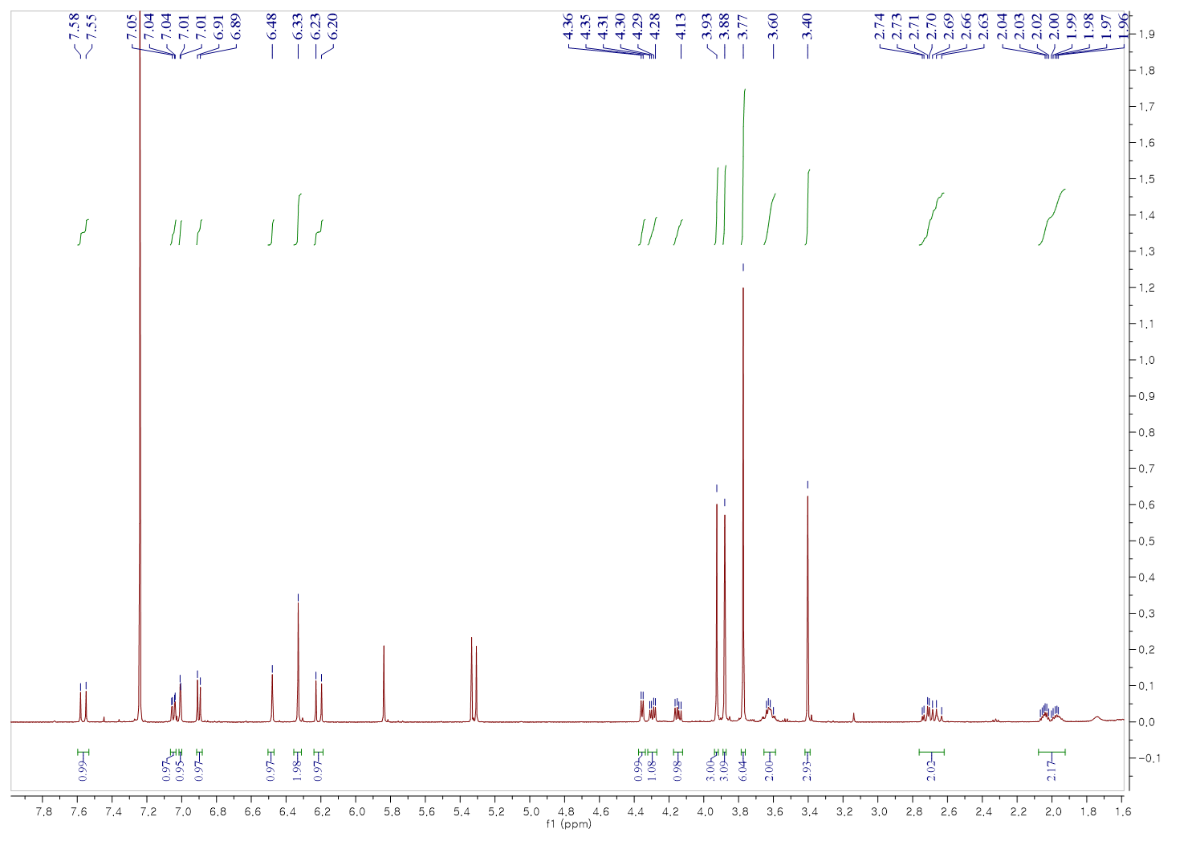


**Figure S7.** 1H NMR spectrum of compound **4**


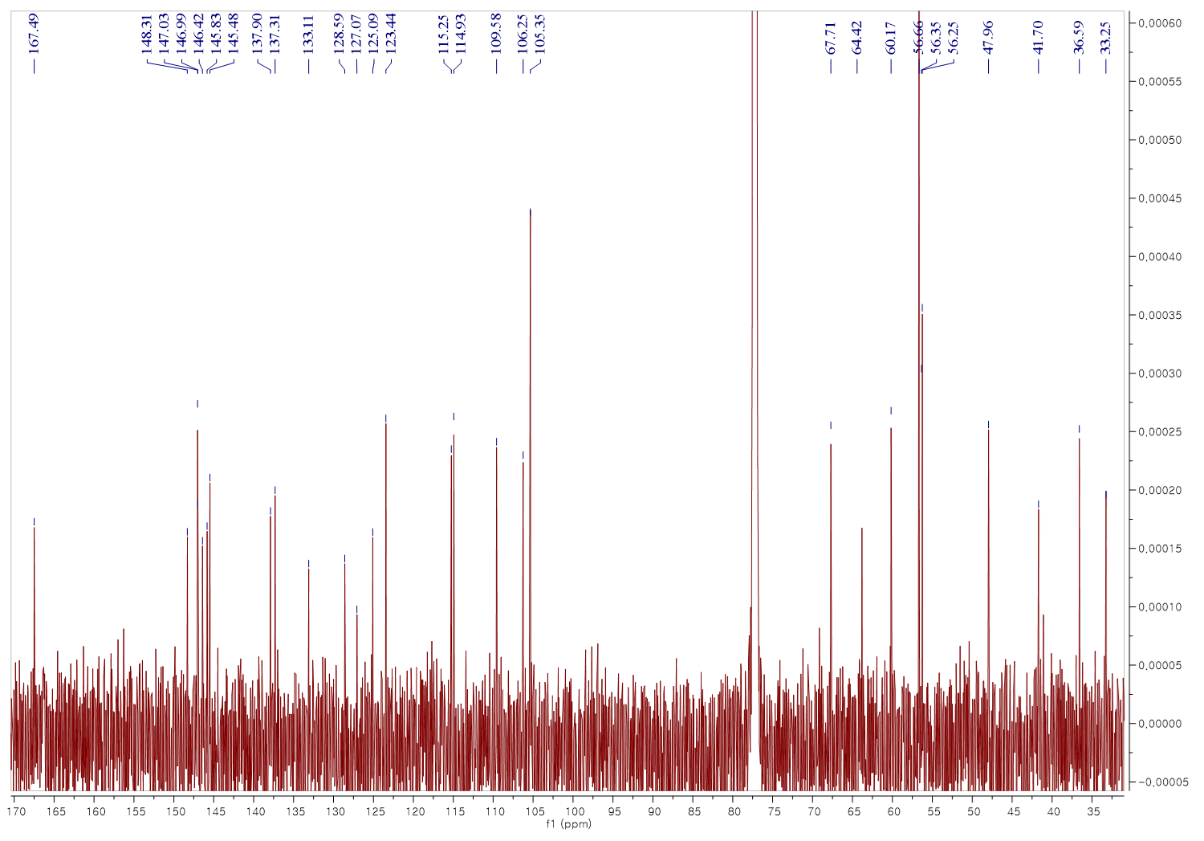


**Figure S8.** 13C NMR spectrum of compound **4**


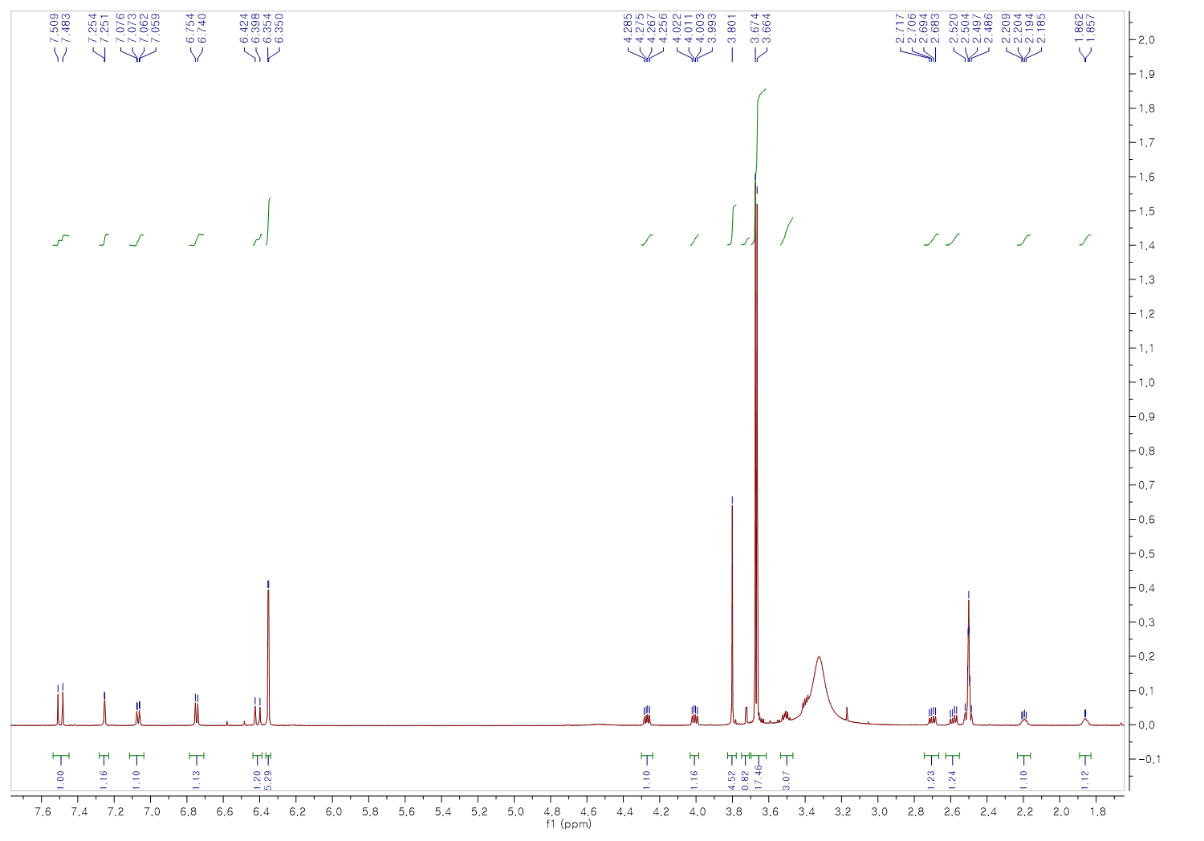


**Figure S9.** 1H NMR spectrum of compound **5**


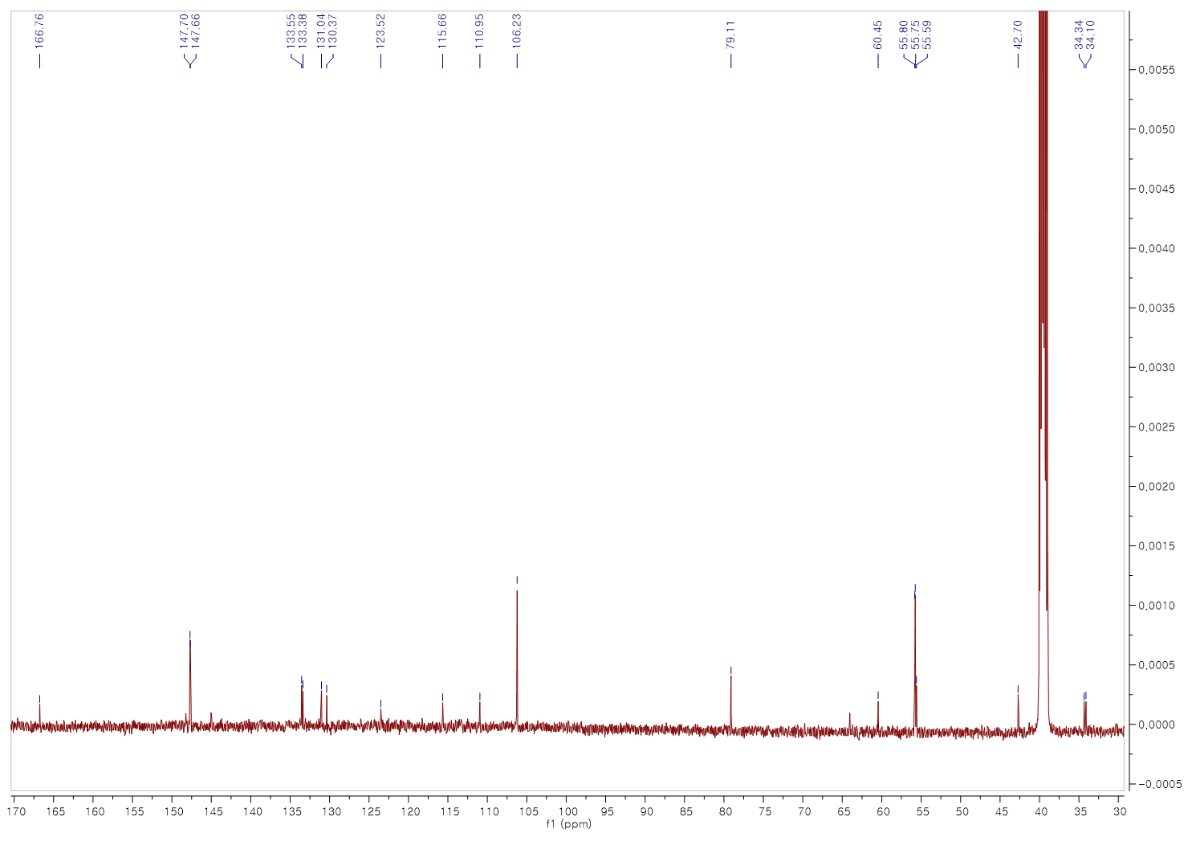


**Figure S10.** 13C NMR spectrum of compound **5**


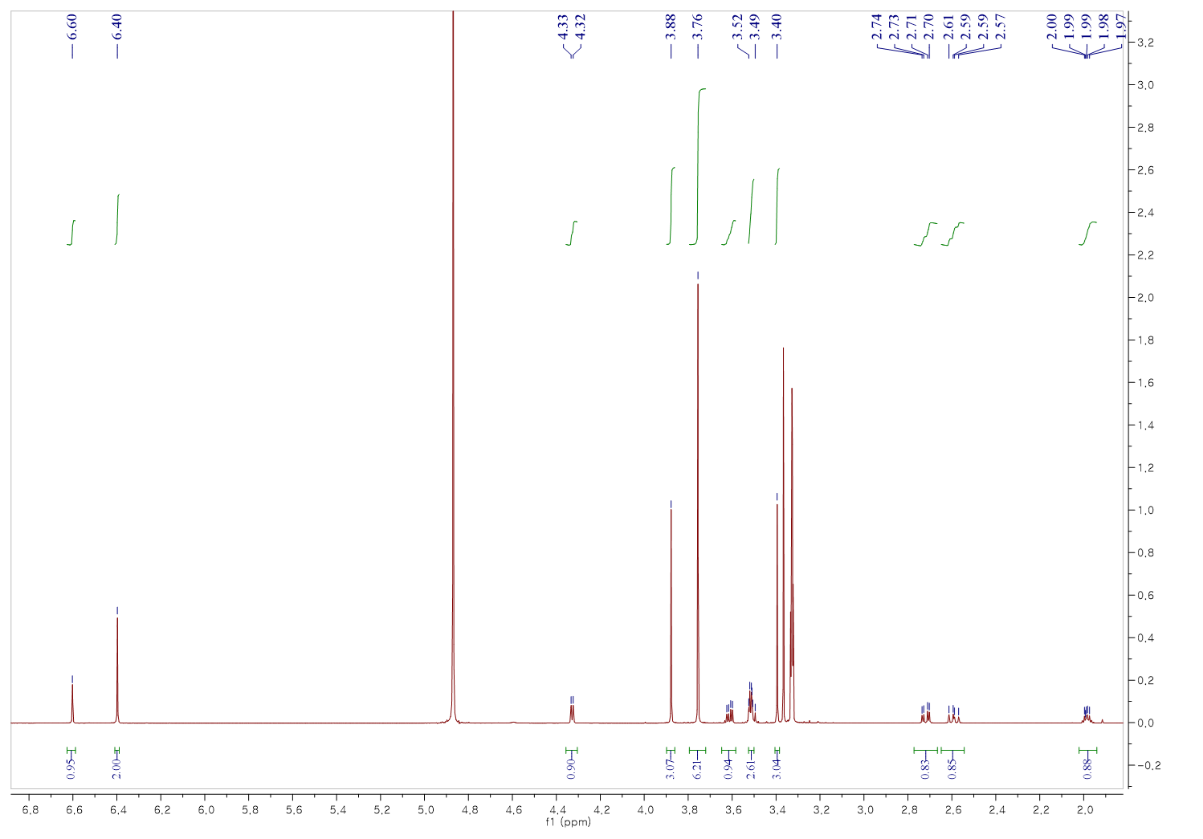


**Figure S11.** 1H NMR spectrum of compound **6**


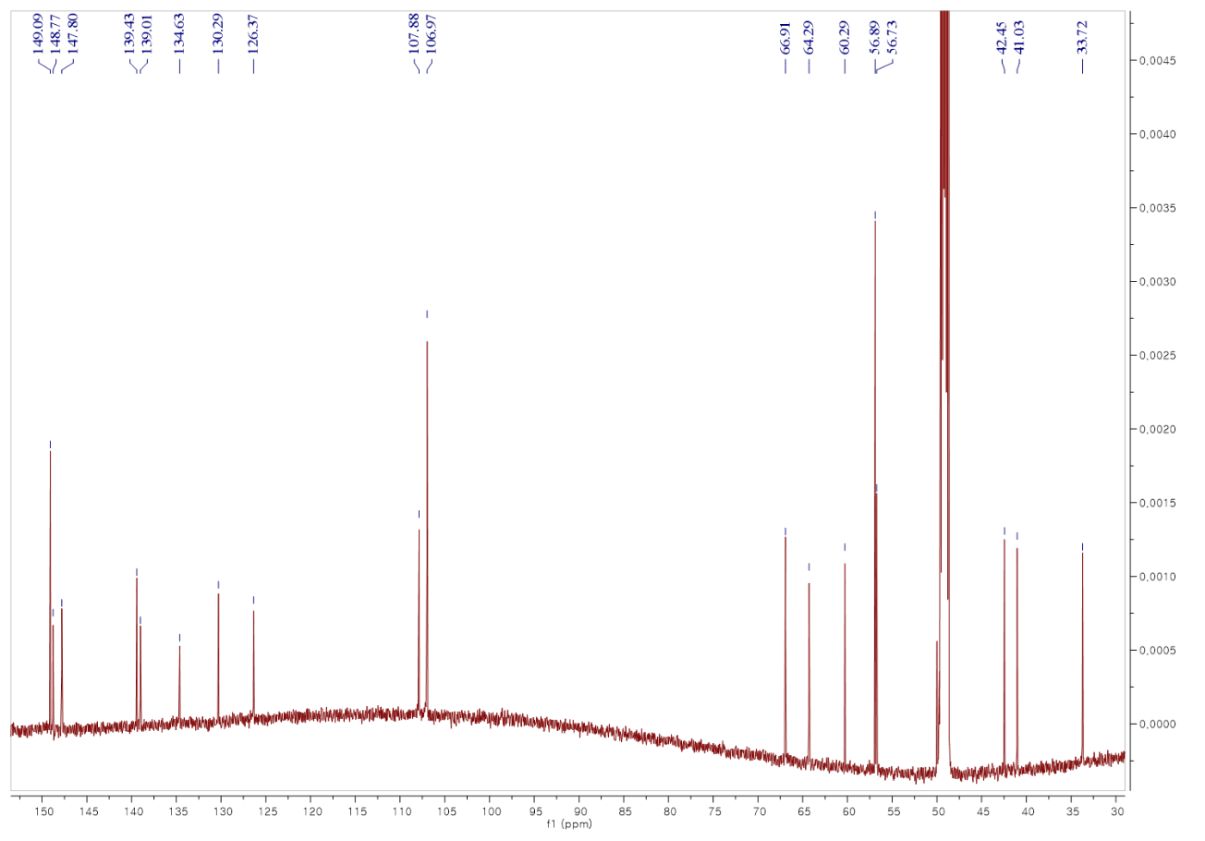


**Figure S12.** 13C NMR spectrum of compound **6**


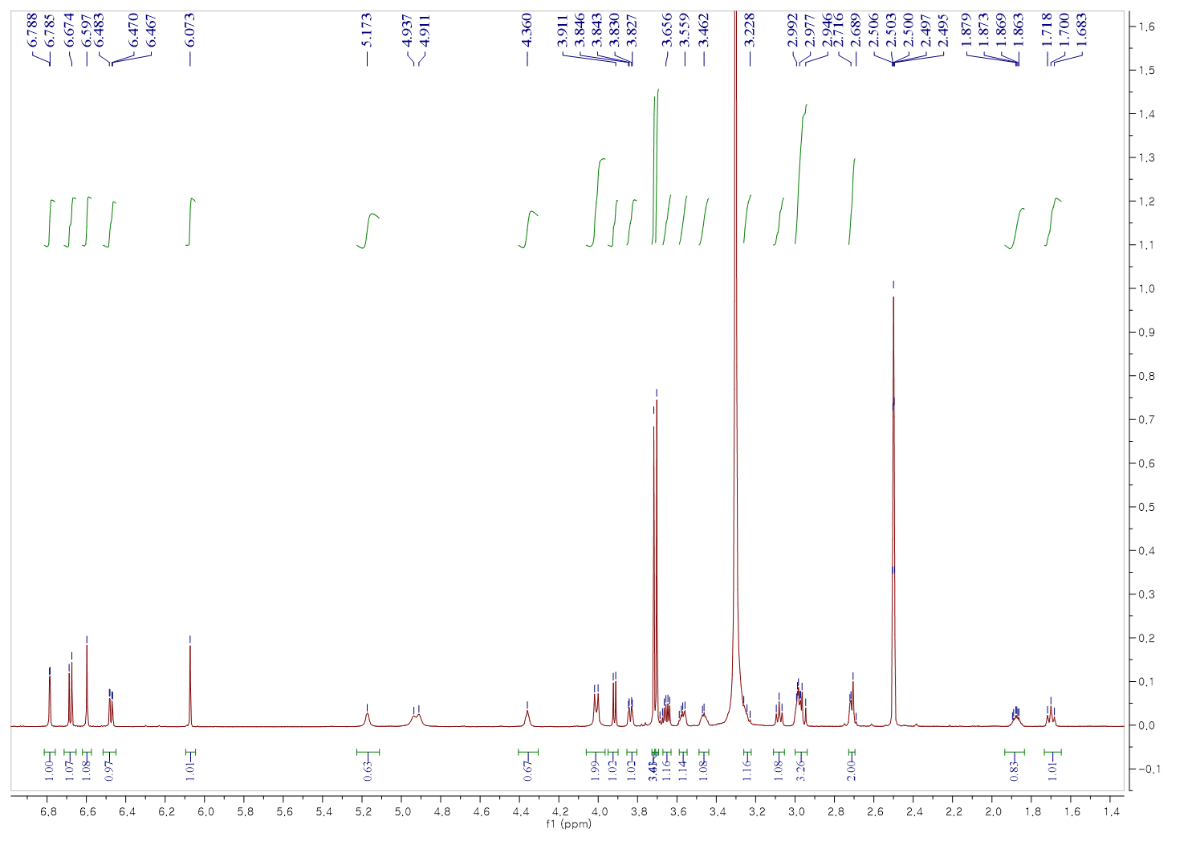


**Figure S13.** 1H NMR spectrum of compound **7**


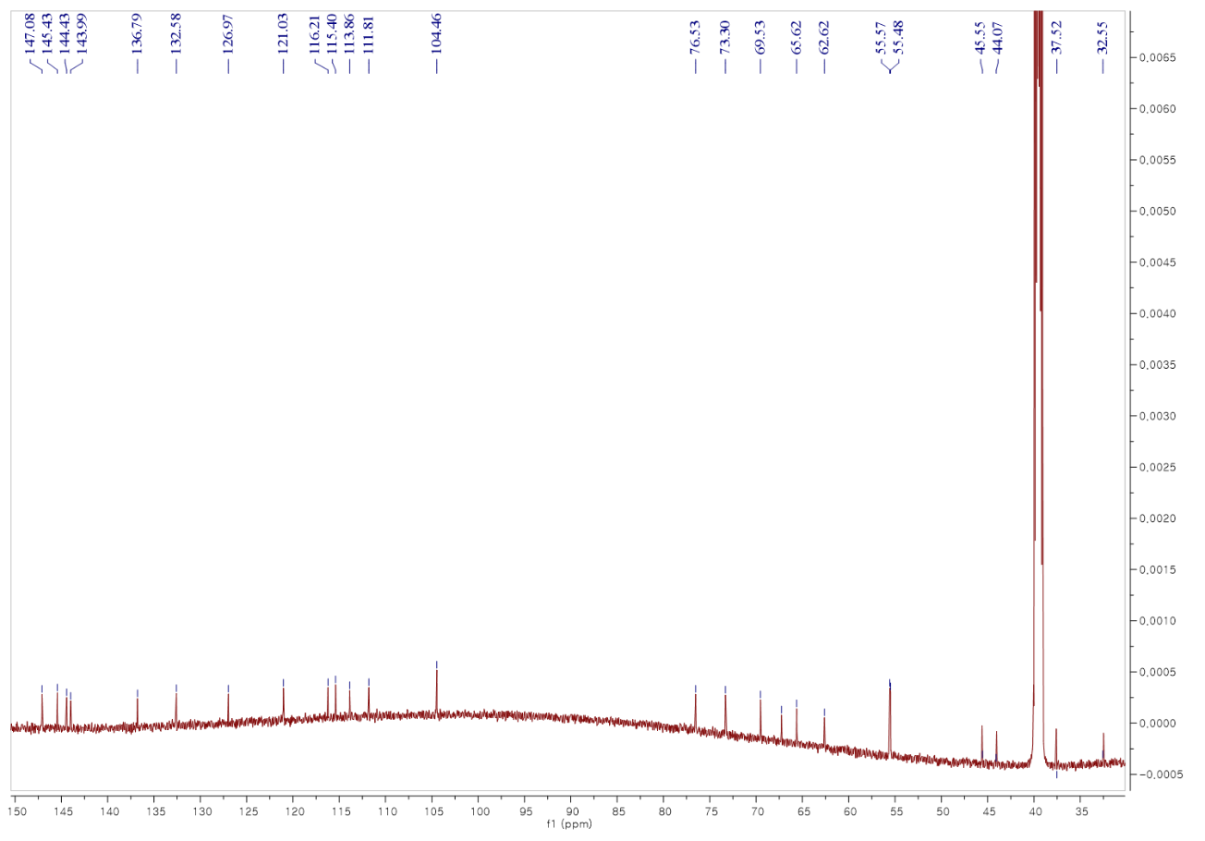


**Figure S14.** 13C NMR spectrum of compound **7**

1. **Authors for correspondence:**

   Dr. Seung Woong Lee

   Tel: +82-63-570-5264

   Fax: +82-63-570-5239

   E-mail: lswdoc[@kribb.re.kr](mailto:rho-m@kribb.re.kr) [↑](#footnote-ref-1)
